# Supplementary material
Source: Springer Nature journal article supplement (https://www.springermedizin.de/resource/supplementary/13046_2013_656_MOESM2_ESM.pdf/9662654)

A

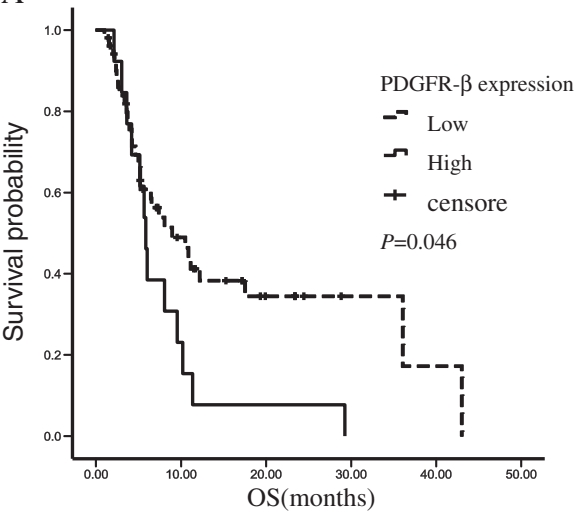

B

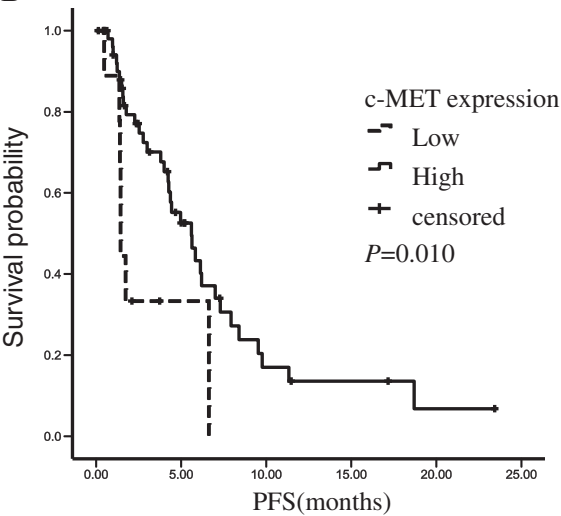

Supplement: MOESM2 [file 9662654]
